# Supplementary material
Source: Springer Nature journal article supplement (https://www.springermedizin.de/resource/supplementary/12891_2012_1477_MOESM1_ESM.pdf/9508340)
Supplement: MOESM1 [file 9508340]

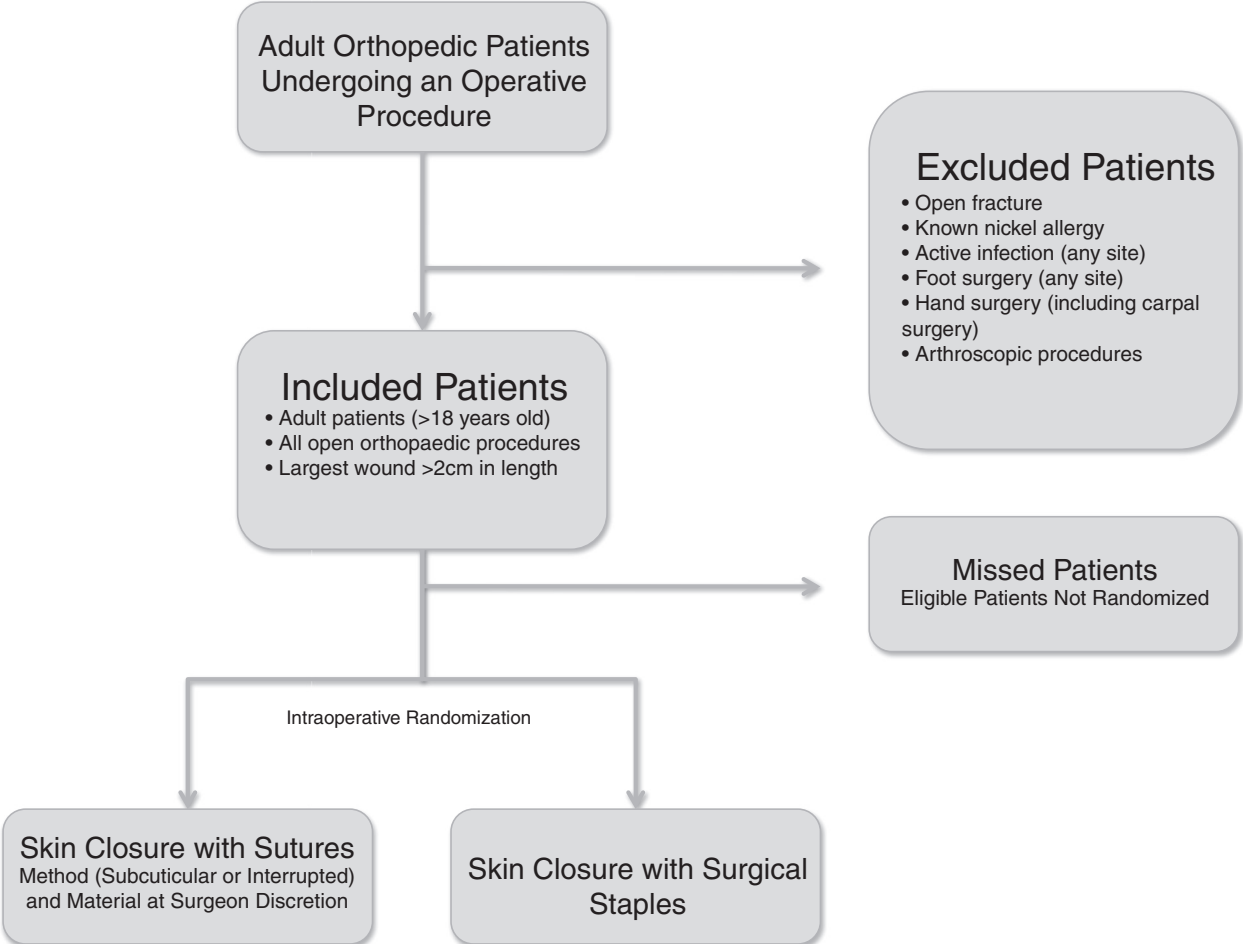

Review of all suspected complications by blinded, independent committee.  
Cases Determined by Self-reported occurrence of complication.
